# Supplementary material for: Metformin prevents nerve growth factor-dependent proliferative and proangiogenic effects in epithelial ovarian cancer cells and endothelial cells
Source: PubMed Central journal article supplement — Ther Adv Med Oncol. 2018 May 4;10:1758835918770984. doi: 10.1177/1758835918770984 (PMC5949935; doi:10.1177/1758835918770984), 2018-05-04
Supplement: Garrido_et_al._Supl_Material.pdf [file Garrido_et_al._Supl_Material.pdf]

# Metformin prevents NGF-dependent proliferative and pro-angiogenic effects in epithelial ovarian cancer cells and endothelial cells

| A2780 |      | B    | N                 | M                | M+N               | GW                | Ab                | GW+N              | Ab+N              |
|-------|------|------|-------------------|------------------|-------------------|-------------------|-------------------|-------------------|-------------------|
| G0/G1 | Mean | 75.9 | 68.1              | 82.9             | 78.3 <sup>c</sup> | 77.8 <sup>d</sup> | 76.2 <sup>d</sup> | 76.8 <sup>d</sup> | 76.9 <sup>d</sup> |
|       | SEM  | 1.4  | 3.5               | 2.2              | 3.5               | 2.0               | 1.6               | 1.7               | 1.4               |
| S     | Mean | 11.8 | 16.7              | 5.5 <sup>a</sup> | 9.8 <sup>c</sup>  | 11.4              | 12.3              | 12.0              | 13.5              |
|       | SEM  | 1.7  | 2.8               | 1.5              | 2.5               | 2.1               | 2.1               | 2.2               | 1.6               |
| G2/M  | Mean | 12.3 | 15.2 <sup>a</sup> | 11.6             | 11.9              | 10.8 <sup>d</sup> | 11.5 <sup>c</sup> | 11.2 <sup>c</sup> | 9.6 <sup>d</sup>  |
|       | SEM  | 0.8  | 0.8               | 1.3              | 1.5               | 0.4               | 0.8               | 0.8               | 0.6               |

## HOSE

|       |      |      |                   |                   |                   |                   |                   |                   |                   |
|-------|------|------|-------------------|-------------------|-------------------|-------------------|-------------------|-------------------|-------------------|
| G0/G1 | Mean | 82.1 | 79.1 <sup>a</sup> | 86.1 <sup>a</sup> | 86.1 <sup>d</sup> | 82.1 <sup>c</sup> | 82.3 <sup>c</sup> | 82.6 <sup>c</sup> | 84.9 <sup>c</sup> |
|       | SEM  | 1.0  | 0.5               | 1.2               | 1.2               | 1.0               | 1.1               | 1.0               | 1.0               |
| S     | Mean | 8.6  | 8.1               | 5.2 <sup>b</sup>  | 5.2 <sup>d</sup>  | 9.0               | 8.7               | 8.7               | 8.0               |
|       | SEM  | 0.6  | 0.1               | 0.4               | 0.3               | 0.7               | 0.7               | 0.7               | 0.7               |
| G2/M  | Mean | 9.3  | 12.8 <sup>a</sup> | 8.7               | 8.7 <sup>c</sup>  | 8.9 <sup>c</sup>  | 9.0               | 8.7 <sup>c</sup>  | 7.1 <sup>c</sup>  |
|       | SEM  | 0.9  | 0.5               | 0.9               | 0.9               | 0.7               | 1.1               | 0.5               | 0.4               |

## EA.hy926

|       |      |      |      |      |                   |                   |                   |                   |                   |
|-------|------|------|------|------|-------------------|-------------------|-------------------|-------------------|-------------------|
| G0/G1 | Mean | 80.6 | 77.4 | 84.2 | 83.8 <sup>c</sup> | 83.7 <sup>c</sup> | 83.7 <sup>c</sup> | 87.0 <sup>c</sup> | 86.8 <sup>d</sup> |
|-------|------|------|------|------|-------------------|-------------------|-------------------|-------------------|-------------------|

|      |      |      |                  |                  |     |                  |                  |                  |                  |
|------|------|------|------------------|------------------|-----|------------------|------------------|------------------|------------------|
|      | SEM  | 1.6  | 1.2              | 2.7              | 2.4 | 2.4              | 2.0              | 1.2              | 1.3              |
| S    | Mean | 11.6 | 13.6             | 10.6             | 9.9 | 10.1             | 9.8              | 8.1 <sup>c</sup> | 7.9 <sup>c</sup> |
|      | SEM  | 1.3  | 1.2              | 1.8              | 1.6 | 1.6              | 1.2              | 0.2              | 0.5              |
| G2/M | Mean | 7.8  | 9.0 <sup>a</sup> | 5.2 <sup>a</sup> | 6.3 | 6.2 <sup>d</sup> | 6.5 <sup>c</sup> | 4.9 <sup>d</sup> | 5.3 <sup>d</sup> |
|      | SEM  | 0.6  | 0.3              | 0.9              | 1.1 | 1.0              | 1.0              | 1.0              | 1.0              |

**Table S1. Cell cycle stages of A2780, HOSE and EA.hy926 cells.**

Cells were treated with metformin 10 mM (M) for 48 hours or NGF 100 ng/mL (N), TRKA inhibitor GW441756 (GW, 20 nM) or a NGF-neutralizing antibody (Ab, 5 µg/mL) for 6 hours. The percentages of cells in different stages of the cell cycle were measured (N=4). Statistically significant changes are indicated as a= p<0.05 and b= p<0.01 respect to basal condition (B); c=p<0.05 and d= p<0.01 respect to NGF group.

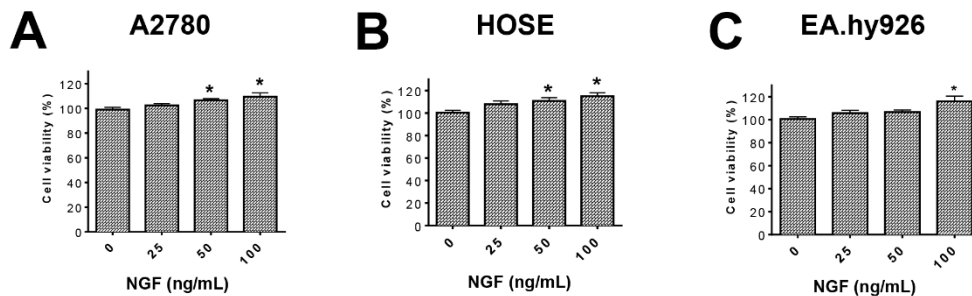

**Figure S1: NGF increases viability of A2780, HOSE and EA.hy926 cells.**

Cells were stimulated with NGF (25, 50 and 100 ng/mL) for 48 hours and then cell viability was evaluated in A2780 (A), HOSE (B) and EA.hy926 (C) cells (N=3, triplicate). Statistically significant changes are indicated as \*= p<0.05, \*\*= P<0.01 and \*\*\*= P<0.001. Statistical analysis: Kruskal Wallis test.

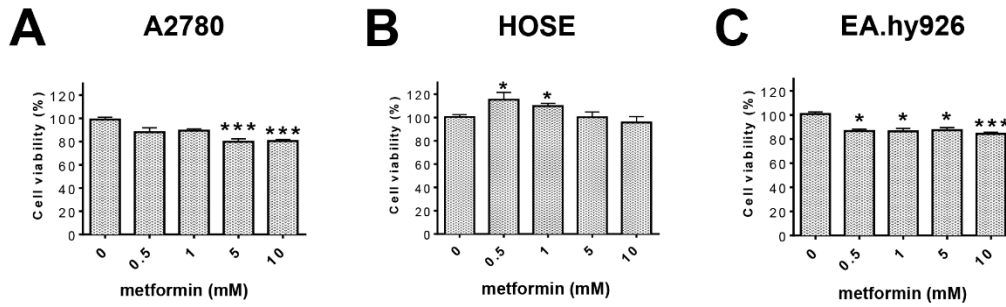

**Figure S2: Metformin decreases viability of A2780 and EA.hy926 cells.**

Cells were stimulated with NGF (25, 50 and 100 ng/mL) for 48 hours and then viability was evaluated in A2780 (A), HOSE (B) and EA.hy926 (C) cells (N=3, triplicate). B: basal; M0.5: metformin 0.5 mM; M5: metformin 5 mM; N: NGF 100 ng/mL. Statistically significant changes are indicated as \*=  $p < 0.05$ , \*\*=  $P < 0.01$  and \*\*\*=  $P < 0.001$ . Statistical analysis: Kruskal Wallis test.

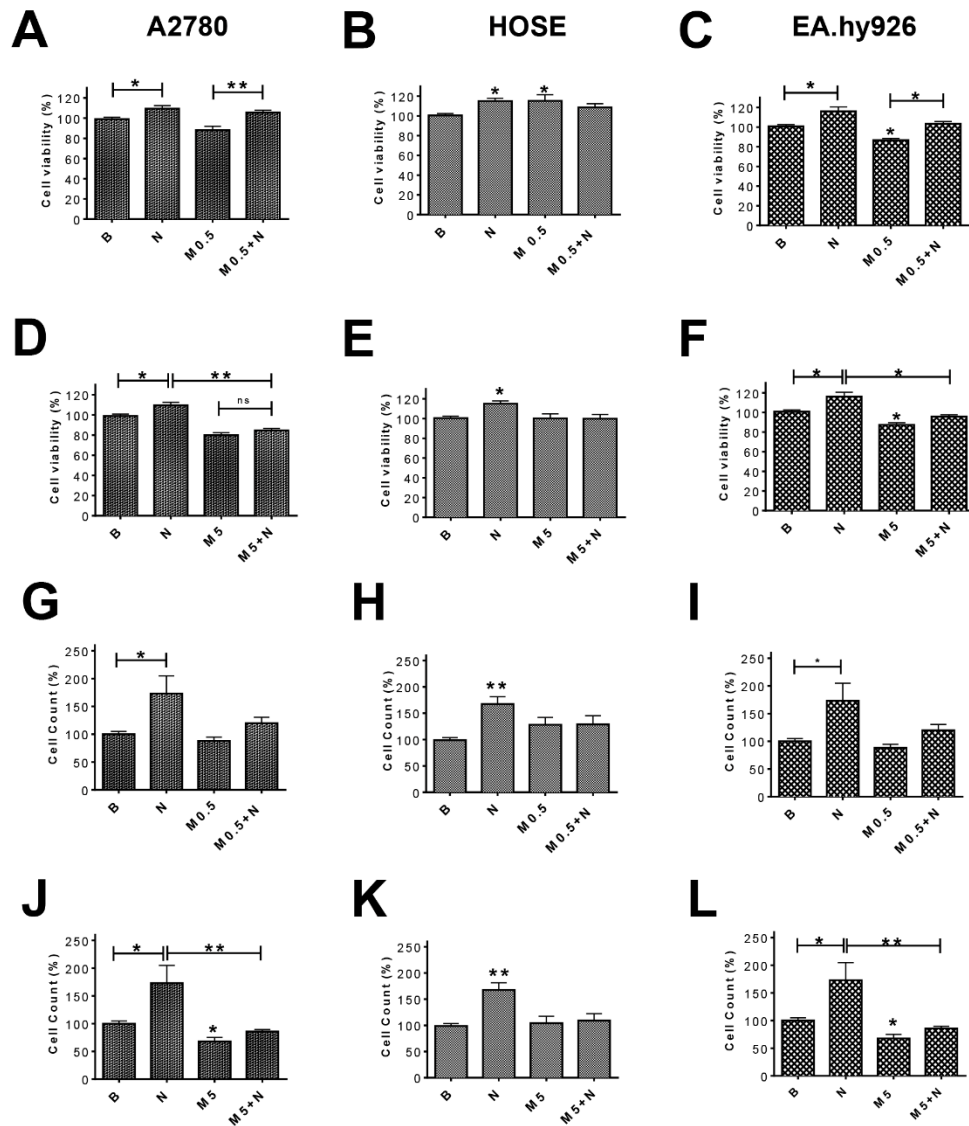

**Figure S3: Metformin treatment precludes NGF-enhanced viability and numbers of A2780, HOSE and EA.hy926 cells.**

A2780 cells (A,D,G,J), HOSE cells (B,E,H,K) and EA.hy926 cells (C,F,I,L) were treated with metformin (0.5 mM and 5 mM) and NGF (100 ng/mL) for 48 hours. (N=3, triplicate). B: basal; M0.5: metformin 0.5 mM; M5: metformin 5 mM; N: NGF 100 ng/mL. Statistically significant differences are indicated as \*= p<0.05 \*\*= p<0.01 and \*\*\*= p<0.001. Statistical analysis: Kruskal Wallis test.

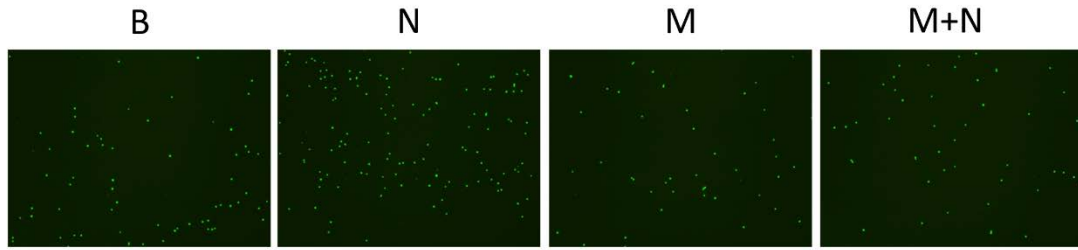

**Figure S4. Metformin treatment precludes NGF-enhanced A2780 cell numbers**

Representative images of A2780 cells treated with metformin 10 mM (M) and NGF 100 ng/mL (N) for 48 hours are shown. Cells were counted after Acridine Orange & Propidium Iodide staining. B: basal condition. Green dots indicate live cells in each condition.

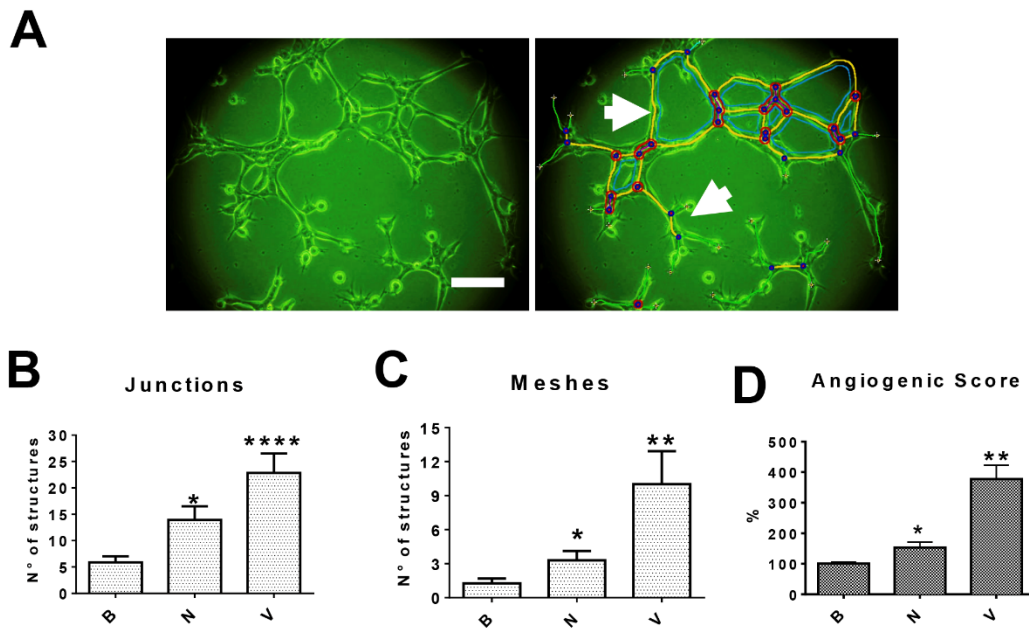

**Figure S5: NGF and VEGF enhanced the angiogenic score of EA.hy926 cells.**

Cells seeded in fresh medium were stimulated with NGF (100 ng/mL) or the positive control VEGF (20 ng/mL) and then incubated on matrigel-covered plates for 8 hours. A: Representative images after analysis by Image J Angiogenesis Analyzer, which highlight cell rows as blue dots and where light blue circles correspond to junctions (B), polygonal structures or meshes (C) respectively. D: Angiogenic score of EA.hy926 cells. (8 images per group; N=3 for VEGF group and N=4 for rest of groups). Statistically significant

differences are indicated as \*=  $p < 0.05$ ; \*\*=  $p < 0.01$  \*\*\*\*=  $p < 0.0001$ , according to Kruskal Wallis test. Magnification bar = 50  $\mu\text{m}$ .
